# Supplementary material for: Crystallisation dynamics in wide-bandgap perovskite films
Source: Royal Society of Chemistry journal article supplement (doi:10.1039/c6ta02769e), 2016-01-01
Supplement: c6ta02769e1.pdf [file c6ta02769e1.pdf]

## Crystallization dynamics in wide-bandgap perovskite films

M. Jaysankar, W. Qiu, J. Bastos, J. G. Tait, M. Debucquoy, U. W. Paetzold, D. Cheyns, and J. Poortmans

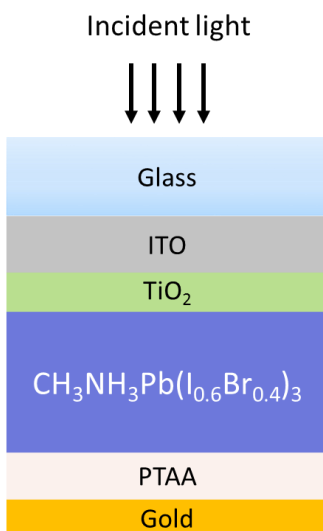

**Figure S1** Schematic layer stack of the *n-i-p* perovskite solar cell.

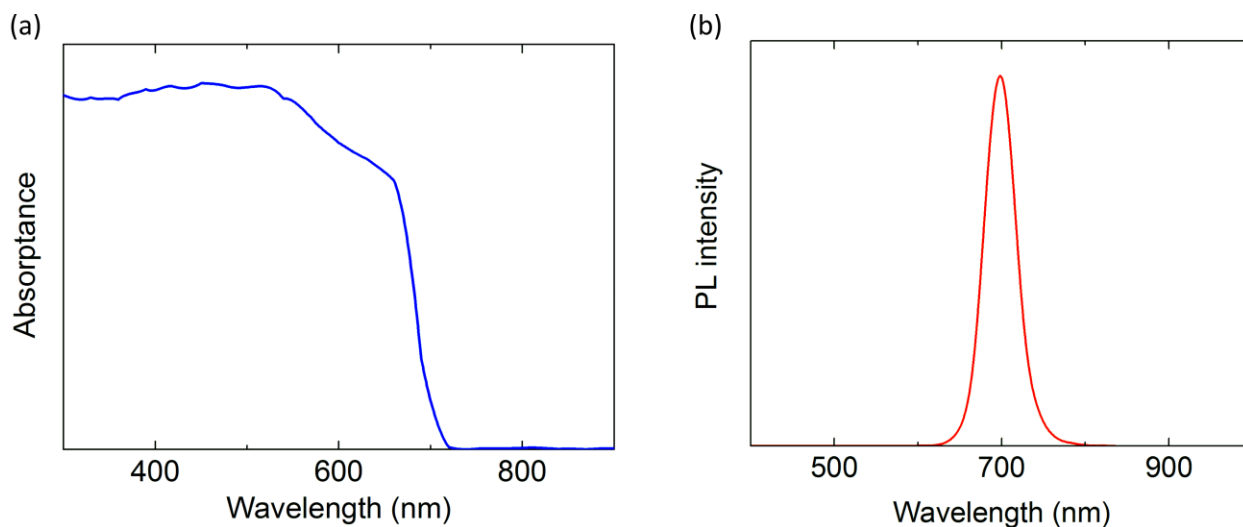

**Figure S2** (a) Normalised absorbance and (b) PL spectra of CH<sub>3</sub>NH<sub>3</sub>Pb(I<sub>0.6</sub>Br<sub>0.4</sub>)<sub>3</sub> film annealed at 110 °C for 90 minutes

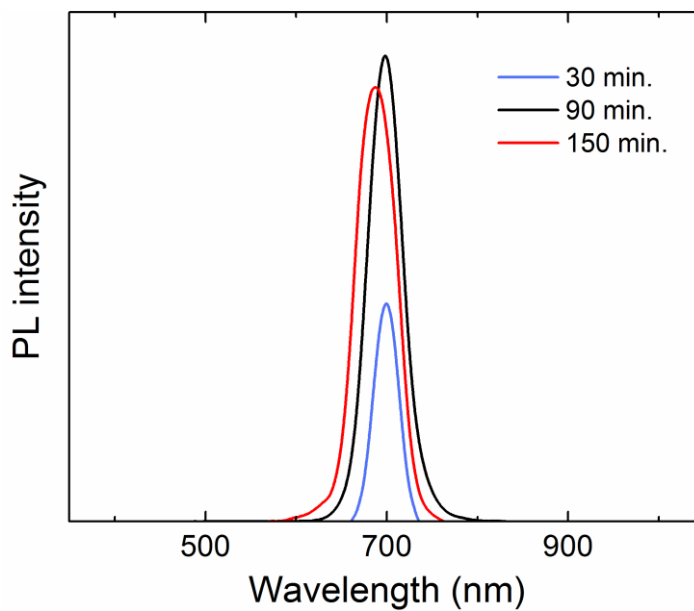

**Figure S3** PL spectra of  $\text{CH}_3\text{NH}_3\text{Pb}(\text{I}_{0.6}\text{Br}_{0.4})_3$  films annealed at 110 °C for different durations.

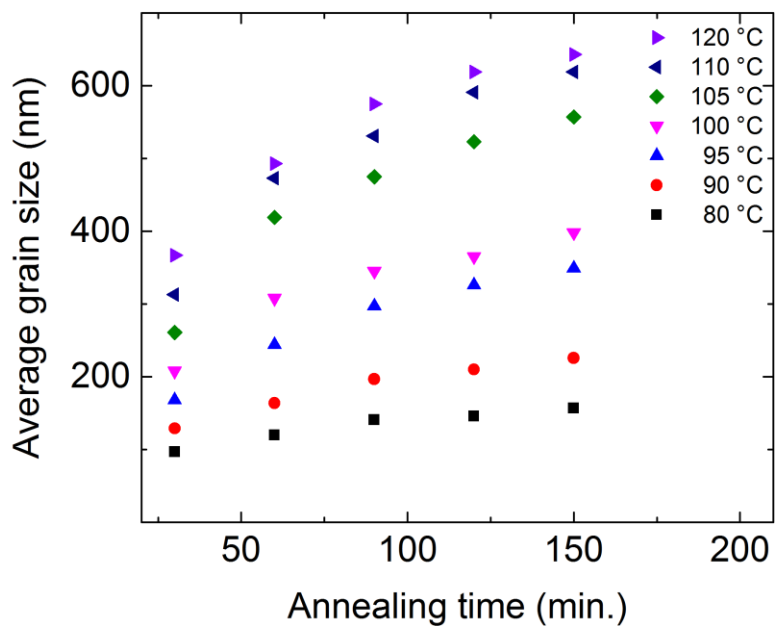

**Figure S4** Average grain sizes in  $\text{CH}_3\text{NH}_3\text{Pb}(\text{I}_{0.6}\text{Br}_{0.4})_3$  films annealed at different conditions.

**Table S1** Photovoltaic parameters of solar cells employing  $\text{CH}_3\text{NH}_3\text{Pb}(\text{I}_{0.6}\text{Br}_{0.4})_3$  films annealed at different annealing conditions.

| Annealing temperature (°C) | Annealing time (min.) | $J_{sc}$ (mA cm <sup>-2</sup> ) | $V_{oc}$ (V) | Fill Factor | PCE (%) |
|----------------------------|-----------------------|---------------------------------|--------------|-------------|---------|
| 80                         | 30                    | 1.09                            | 0.85         | 0.52        | 0.48    |
| 80                         | 60                    | 1.71                            | 0.86         | 0.54        | 0.79    |
| 80                         | 90                    | 2.38                            | 0.86         | 0.55        | 1.13    |
| 80                         | 120                   | 3.08                            | 0.87         | 0.55        | 1.47    |
| 80                         | 150                   | 3.21                            | 0.87         | 0.56        | 1.56    |
| 90                         | 30                    | 1.58                            | 0.89         | 0.49        | 0.69    |
| 90                         | 60                    | 6.68                            | 0.90         | 0.58        | 3.49    |
| 90                         | 90                    | 10.21                           | 0.91         | 0.66        | 6.13    |
| 90                         | 120                   | 10.59                           | 0.95         | 0.70        | 7.04    |
| 90                         | 150                   | 10.52                           | 0.94         | 0.69        | 6.82    |
| 95                         | 30                    | 3.39                            | 0.81         | 0.43        | 1.18    |
| 95                         | 60                    | 9.91                            | 0.90         | 0.59        | 5.26    |
| 95                         | 90                    | 11.92                           | 0.97         | 0.67        | 7.75    |
| 95                         | 120                   | 11.69                           | 0.97         | 0.63        | 7.14    |
| 95                         | 150                   | 11.43                           | 0.99         | 0.61        | 6.90    |
| 100                        | 30                    | 6.91                            | 0.92         | 0.58        | 3.69    |
| 100                        | 60                    | 11.88                           | 1.01         | 0.68        | 8.16    |
| 100                        | 90                    | 12.09                           | 1.05         | 0.71        | 9.01    |
| 100                        | 120                   | 12.07                           | 1.04         | 0.71        | 8.91    |
| 100                        | 150                   | 12.06                           | 1.01         | 0.70        | 8.53    |
| 105                        | 30                    | 11.59                           | 0.95         | 0.65        | 7.16    |
| 105                        | 60                    | 12.11                           | 1.04         | 0.70        | 8.82    |
| 105                        | 90                    | 12.38                           | 1.06         | 0.71        | 9.32    |
| 105                        | 120                   | 12.21                           | 1.04         | 0.70        | 8.89    |
| 105                        | 150                   | 12.2                            | 1.03         | 0.69        | 8.67    |
| 110                        | 30                    | 12.19                           | 1.08         | 0.66        | 8.69    |
| 110                        | 60                    | 12.28                           | 1.09         | 0.70        | 9.37    |
| 110                        | 90                    | 13.28                           | 1.11         | 0.72        | 10.61   |
| 110                        | 120                   | 12.13                           | 1.10         | 0.70        | 9.34    |
| 110                        | 150                   | 12.27                           | 1.09         | 0.69        | 9.23    |
| 120                        | 30                    | 12.11                           | 0.93         | 0.63        | 7.10    |
| 120                        | 60                    | 11.37                           | 0.91         | 0.59        | 6.10    |
| 120                        | 90                    | 9.09                            | 0.90         | 0.55        | 4.50    |
| 120                        | 120                   | 8.93                            | 0.89         | 0.54        | 4.29    |
| 120                        | 150                   | 8.81                            | 0.87         | 0.51        | 3.91    |
